# Supplementary material
Source: MDPI journal article supplement (https://www.mdpi.com/2076-3298/2/3/415)
Supplement: s1 [file s1]

*Supplementary Information*

**Using Landscape Metrics Analysis and Analytic Hierarchy Process to Assess Water Harvesting
Potential Sites in Jordan**

**Supplementary S1. Landscape Metrics**

Ten metrics associated with the presence and abundance of land cover types (LCTs) were selected in this study: Class Area (CA), Class Area Proportion (CAP), Mean Patch Size (MPS), Radius of gyration (GYRATE), Proximity Index (PROX), Number of Patches (PN), Total Edge (TE), Edge Contrast (ECON), Shape Index (SHAPE), and Euclidean Nearest Neighbor Distance (ENN).
These metrics have been defined according to MaGrigal and Marks (1995) [1], and a brief description can be found in Table S1.

**Table S1.** Description of landscape metrics used *.

| **Landscape Metrics** | | |
| --- | --- | --- |
| **Name** | **Abbreviation** | **Description** |
| Class Area | CA | The sum of the areas of all patches of the corresponding patch type. |
| Class Area Proportion | CAP | The sum of the areas of all patches of the corresponding patch type,  divided by the total landscape area, and multiplied by 100. |
| Mean Patch Size | MPS | The average size of patches in a particular LCT at the class level,  or across the entire landscape at the landscape level. |
| Radius of gyration | GYRATE | The mean distance between each cell in a patch and the centre of patch. |
| GYRATE_AM (area-weighted mean) at the class level equals the sum across all patches of the corresponding patch type, of the radius of gyration (GYRATE) multiplied by the proportional abundance of the patch (*i.e*., the patch area divided by the sum of all patch areas of the corresponding patch type). |
| Proximity Index | PROX | The sum of the area of each neighbouring patch of the same LCT that lies  within a specified neighbourhood distance from the focal patch, after weighting  the area of each neighbouring patch by its distance from the focal patch. |
| PROX_AM (area-weighted mean) at the class level equals the sum across all  patches of corresponding patch types of the proximity index (PROX)  of each patch multiplied by the proportional abundance of patches. |
| Number of Patches | PN | The total number of patches. This metric can be applied at the landscape  and class levels. The landscape level includes all patches of all classes.  The class level includes all patches within a specified LCT. |
| Total Edge | TE | The sum of the lengths of all edge segments that involve the corresponding patch type. |

**Table S1.** *Cont.*

| **Landscape Metrics** | | |
| --- | --- | --- |
| **Name** | **Abbreviation** | **Description** |
| Edge Contrast | ECON | The degree of “contrast” between the focal class and its  neighbourhood, where contrast is user-defined and represents the  magnitude of difference between classes in one or more attributes. |
| ECON_AM (area-weighted mean) equals the total amount of edge  per area, weighted by the contrast between the different LCTs. |
| Shape Index | SHAPE | The ratio of perimeter to area adjusted by a constant to  account for a particular patch shape (usually a square). |
| SHAPE_AM (area-weighted mean) equals the average  shape index of patches, weighted by patch area so that  larger patches have greater weight than smaller ones. |
| Nearest Neighbour Distance | ENN | The sum of the distance (m) to the nearest neighbouring patch of the same  type, based on the nearest edge to edge distance, for each patch of the  corresponding patch type, divided by the number of patches of this same type. |
| ENN_AM (area-weighted mean) equals the sum of the distance of the nearest neighbour of each patch multiplied by the proportional abundance  of the patch (*i.e*., patch area divided by the sum of patch areas of the  corresponding patch type), across all patches of the corresponding patch type. |

* See [1] for more detailed description or visit the Fragstats website (www.unix.oit.umass.edu/∼fragstat/).

**Reference List of the Underlying Primary Studies**

1. McGarigal, K.; Marks, B.J. *Spatial Pattern Analysis Program for Quantifying Landscape Structure (General Technical Report PNW-GTR-351)*; US Department of Agriculture, Forest Service, Pacific Northwest Research Station: Portland, OR, USA, 1995.

© 2015 by the authors; licensee MDPI, Basel, Switzerland. This article is an open access article distributed under the terms and conditions of the Creative Commons Attribution license (http://creativecommons.org/licenses/by/4.0/).
